# Supplementary material
Source: HighWire-hosted journal article supplement (https://www.cmaj.ca/content/suppl/2017/06/28/189.26.E881)
Supplement: 161152-res-11-at.pdf [file 161152-res-11-at.pdf]

### Appendix 11 (as supplied by the authors): Leave-one-out analysis

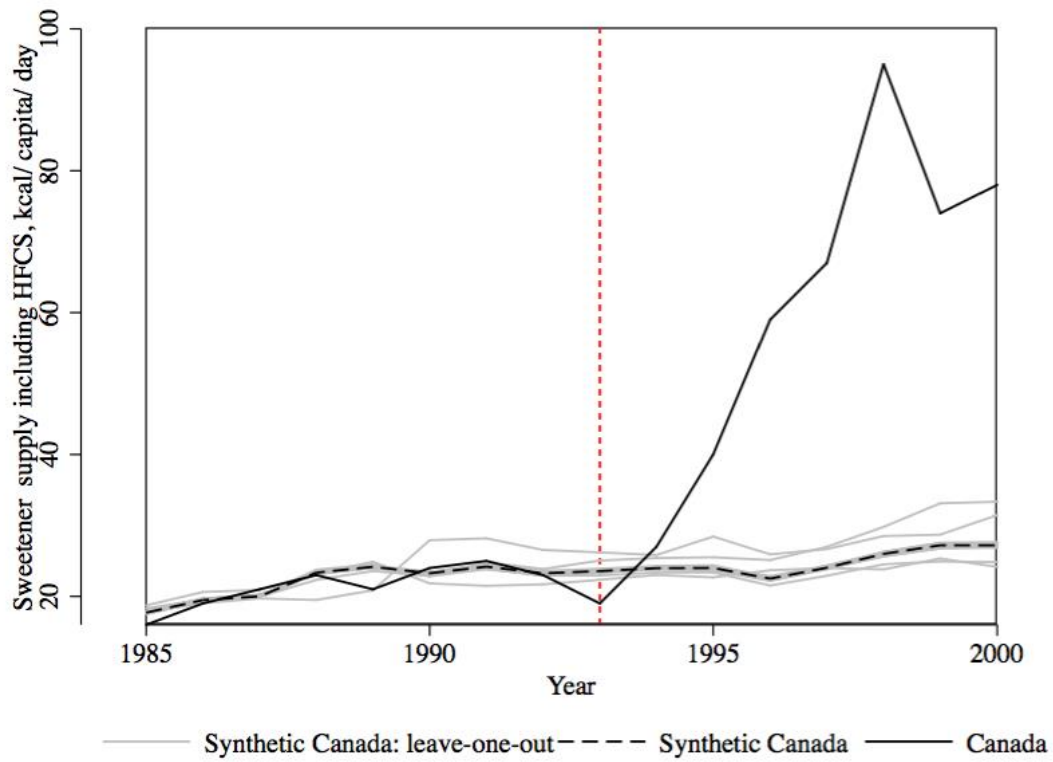

Notes: Vertical line shows when NAFTA was implemented on 1 January 1994.
